# Supplementary material for: Bioactive secondary metabolites from new endophytic fungus Curvularia. sp isolated from Rauwolfia macrophylla
Source: PubMed Central journal article supplement (PMC6597039; doi:10.1371/journal.pone.0217627), 2019-06-27
Supplement: pone.0217627.s001.pdf [file pone.0217627.s001.pdf]

**S1 Table.**  $^{13}\text{C}$  (125 MHz) and  $^1\text{H}$  (500 MHz) NMR data of 2'-deoxyribolactone (**1**) in  $\text{CD}_3\text{OD}$ 

| No. | $\delta_{\text{C}}$ | $\delta_{\text{H}}$ ( <i>J</i> in Hz)         |
|-----|---------------------|-----------------------------------------------|
| 2   | 177.4               | -                                             |
| 3   | 37.7                | 2.92 (dd, 18.0, 6.8), 2.37<br>(dd, 18.0, 2.5) |
| 4   | 68.3                | 4.43 (dt, 6.7, 2.3)                           |
| 5   | 88.8                | 4.37 (td, 3.4, 2.2)                           |
| 6   | 61.1                | 3.76 (dd, 12.4, 3.3), 3.69<br>(dd, 12.5, 3.6) |
