# Supplementary material for: Bioactive secondary metabolites from new endophytic fungus Curvularia. sp isolated from Rauwolfia macrophylla
Source: PubMed Central journal article supplement (PMC6597039; doi:10.1371/journal.pone.0217627), 2019-06-27
Supplement: pone.0217627.s002.pdf [file pone.0217627.s002.pdf]

**S2 Table.**  $^{13}\text{C}$  (125 MHz) and  $^1\text{H}$  (500 MHz) NMR data of hexylitaconic acid (**2**) in  $\text{CDCl}_3$ 

| No. | $\delta_{\text{C}}$ | $\delta_{\text{H}}$ (J in Hz) |
|-----|---------------------|-------------------------------|
| 1   | 178.9               | -                             |
| 2   | 47.4                | 3.32 (t, 7.5)                 |
| 3   | 137.6               | -                             |
| 4   | 171.1               | -                             |
| 5   | 129.1               | 6.41 (s), 5.74 (s)            |
| 1'  | 29.6                | 1.85 (m), 1.65 (d, 10.5)      |
| 2'  | 27.3                | 1.24 (m)                      |
| 3'  | 29.0                | 1.24 (m)                      |
| 4'  | 31.6                | 1.20 (m)                      |
| 5'  | 22.6                | 1.20 (m)                      |
| 6'  | 14.0                | 0.81 (t, 6.6)                 |
