# Supplementary material for: Bioactive secondary metabolites from new endophytic fungus Curvularia. sp isolated from Rauwolfia macrophylla
Source: PubMed Central journal article supplement (PMC6597039; doi:10.1371/journal.pone.0217627), 2019-06-27

**S1 Fig.**  $^1\text{H}$  NMR spectrum ( $\text{CD}_3\text{OD}$ , 500 MHz) of 2'-deoxyribolactone (**1**)

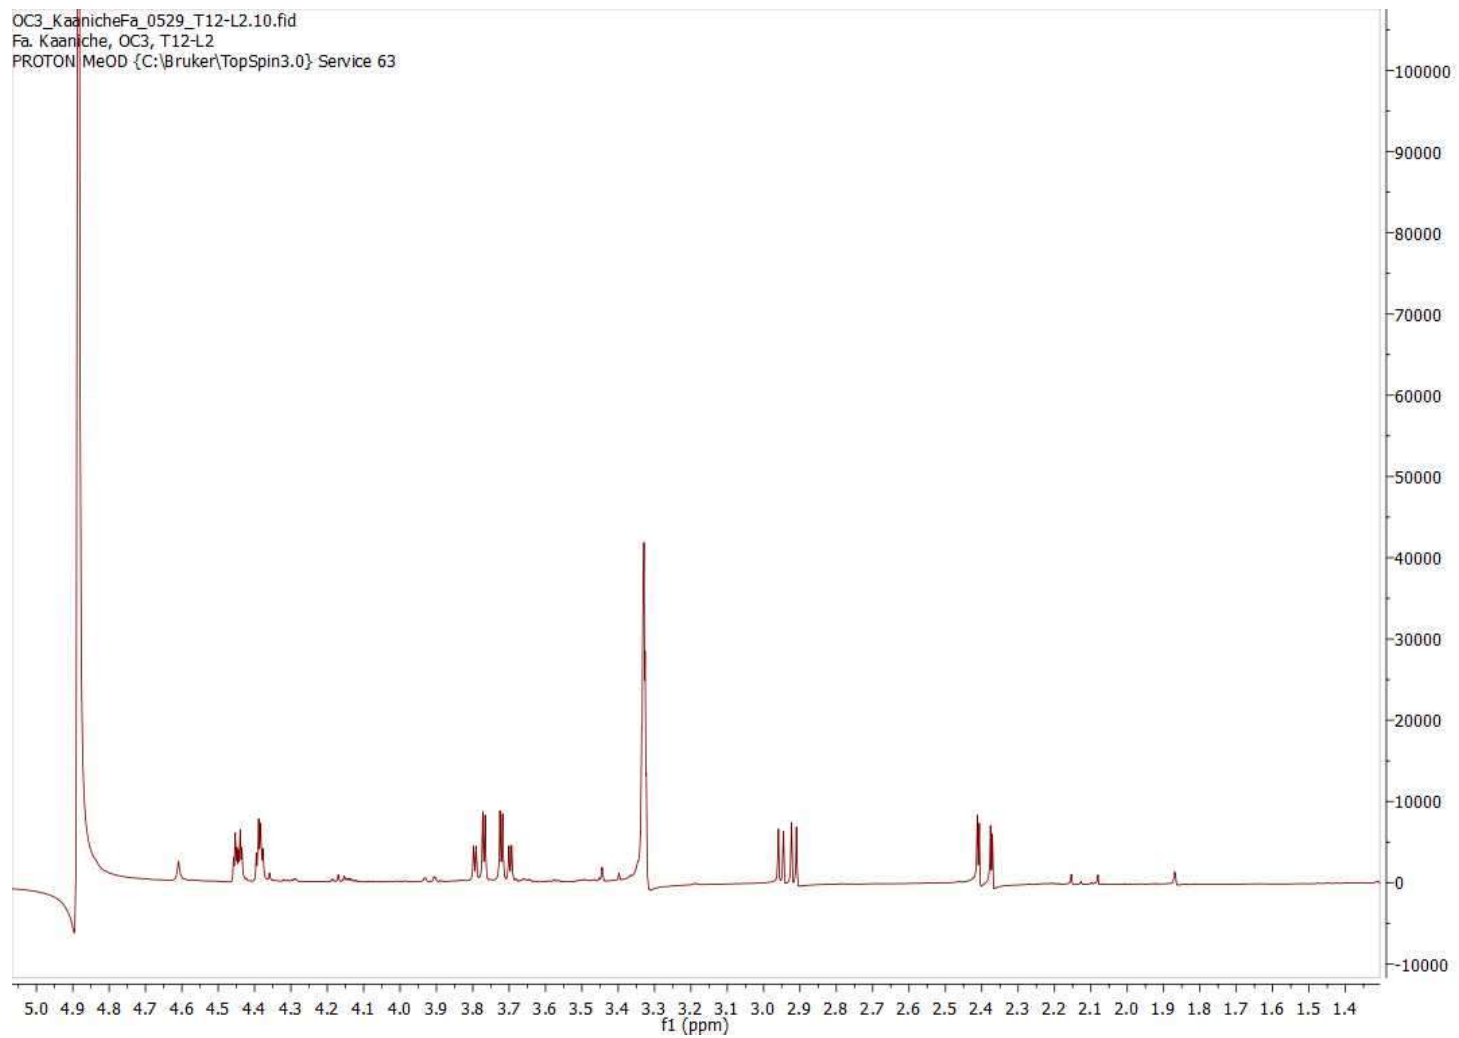

Supplement: pone.0217627.s003.pdf [file pone.0217627.s003.pdf]
