# Supplementary material for: Bioactive secondary metabolites from new endophytic fungus Curvularia. sp isolated from Rauwolfia macrophylla
Source: PubMed Central journal article supplement (PMC6597039; doi:10.1371/journal.pone.0217627), 2019-06-27

**S4 Fig.** H,H-COSY spectrum (CD<sub>3</sub>OD, 500 MHz) of 2'-deoxyribolactone (**1**)

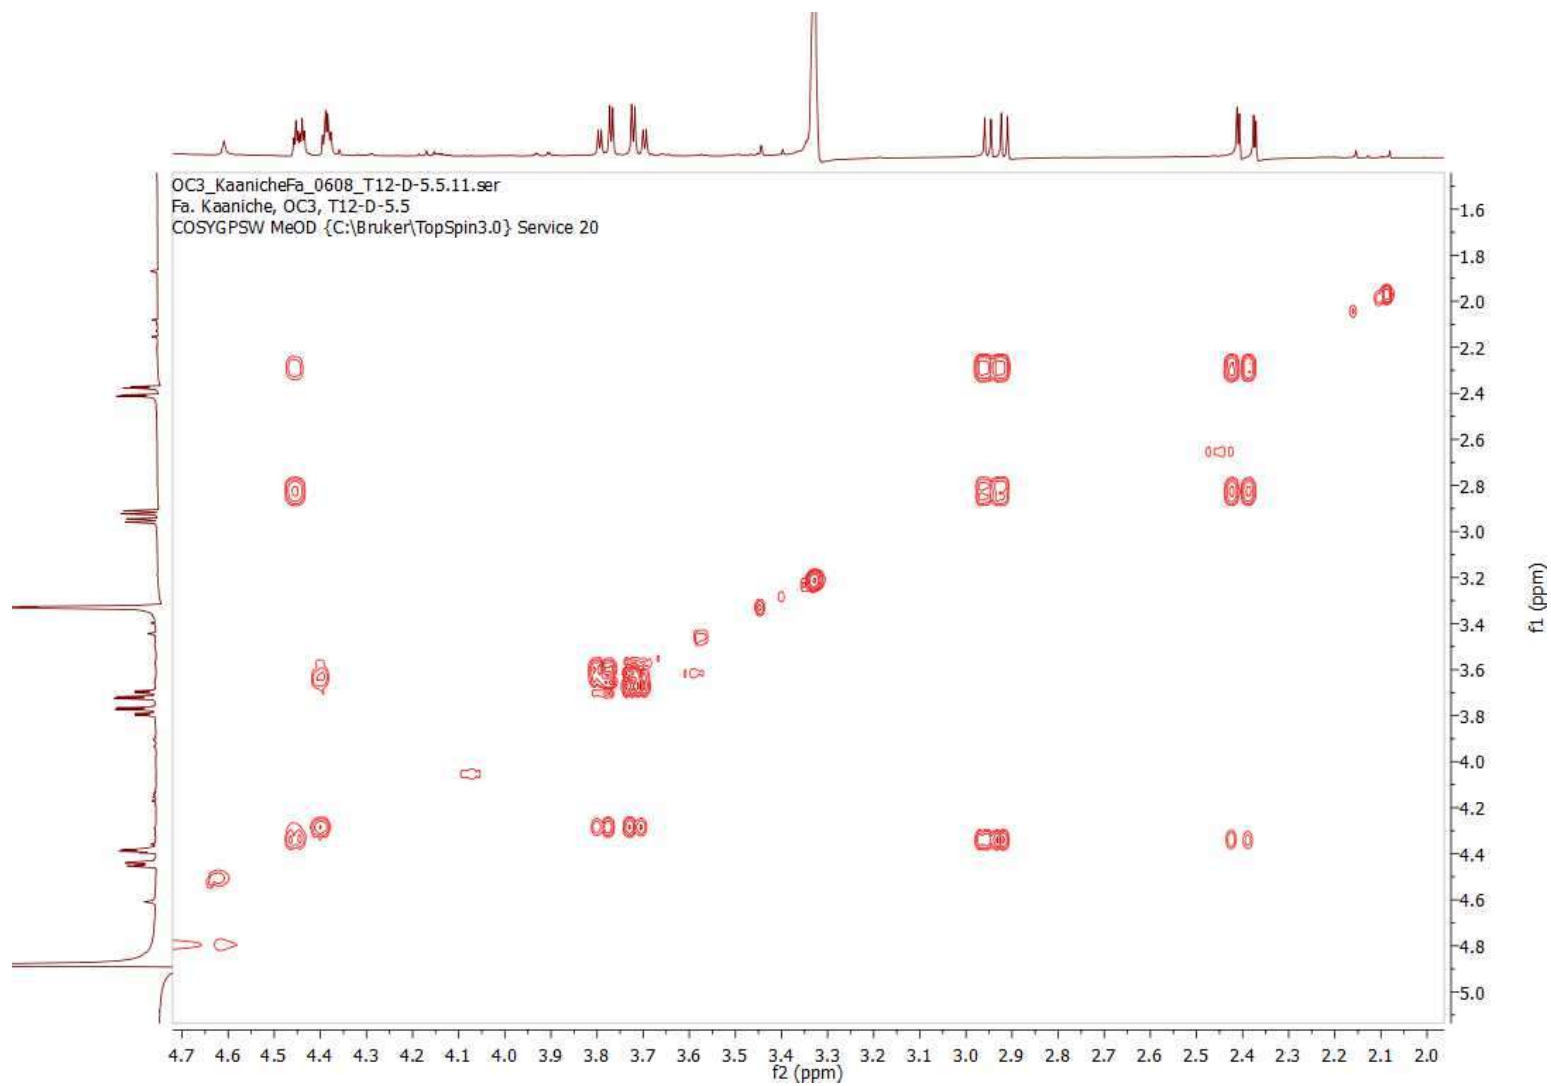

Supplement: pone.0217627.s006.pdf [file pone.0217627.s006.pdf]
