# Supplementary material for: Bioactive secondary metabolites from new endophytic fungus Curvularia. sp isolated from Rauwolfia macrophylla
Source: PubMed Central journal article supplement (PMC6597039; doi:10.1371/journal.pone.0217627), 2019-06-27

S6 Fig. HMBC spectrum (CD<sub>3</sub>OD, 500 MHz) of 2'-deoxyribolactone (1)

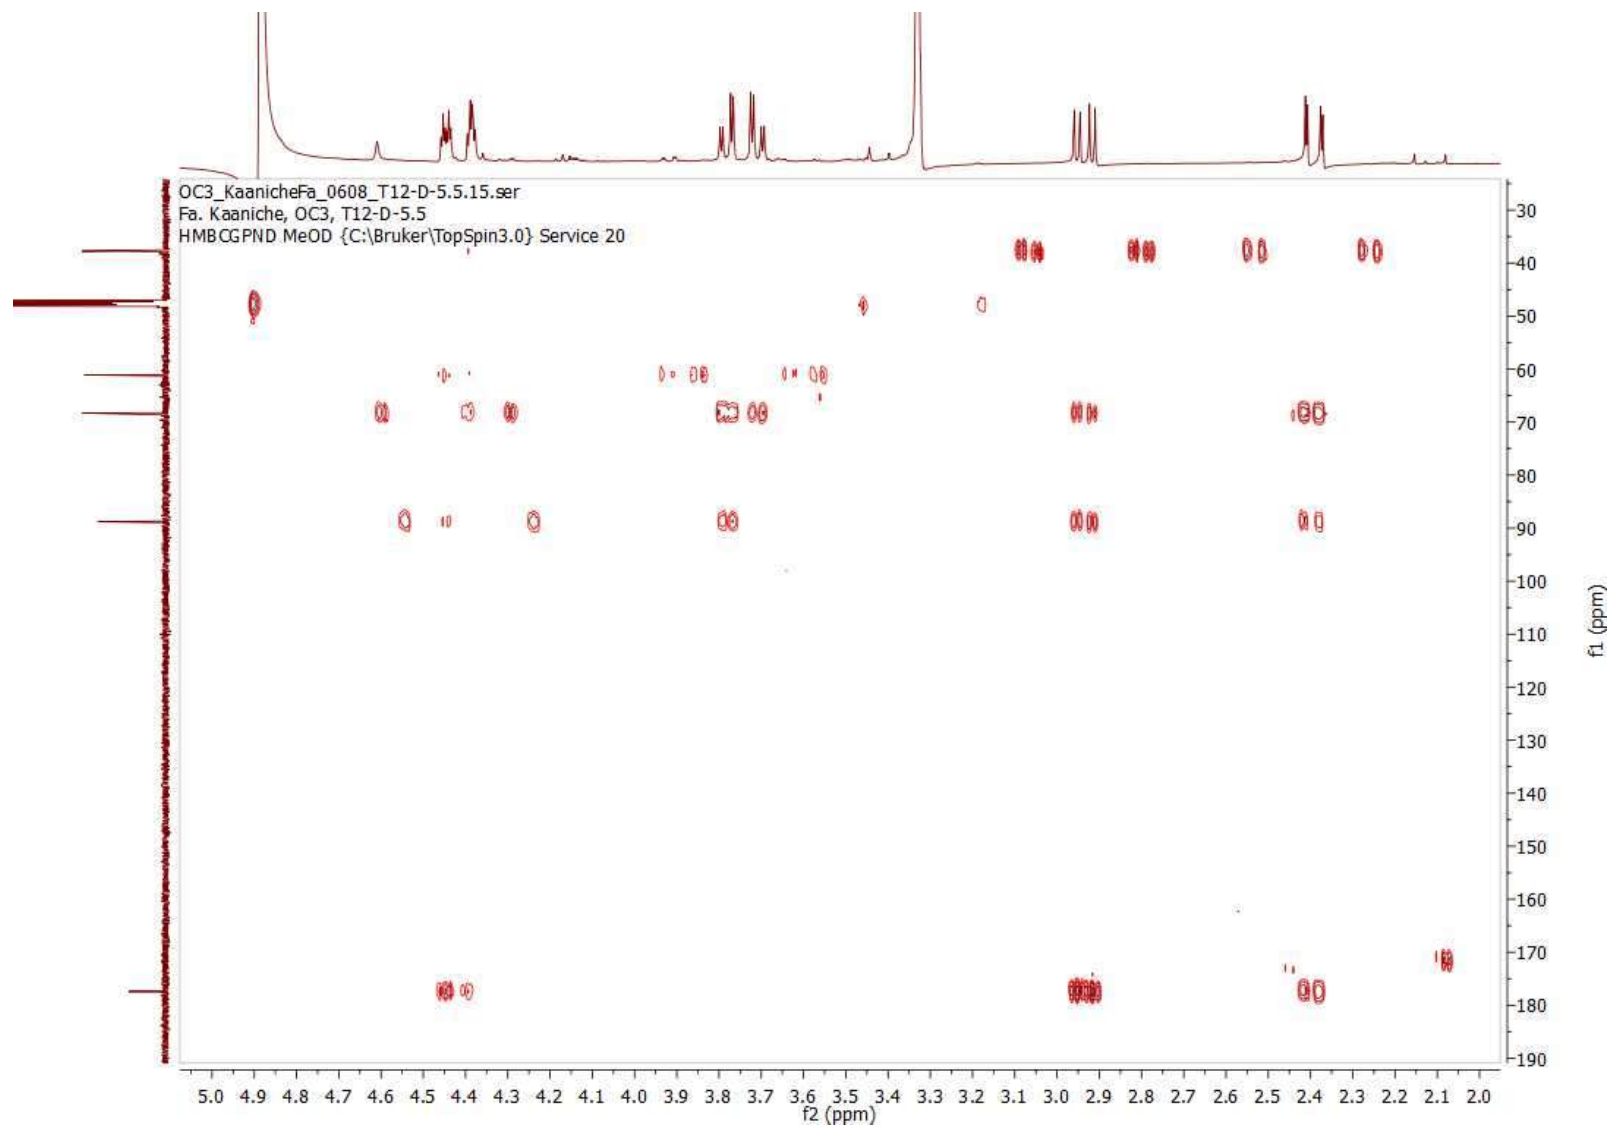

Supplement: pone.0217627.s008.pdf [file pone.0217627.s008.pdf]
