# Supplementary material for: Bioactive secondary metabolites from new endophytic fungus Curvularia. sp isolated from Rauwolfia macrophylla
Source: PubMed Central journal article supplement (PMC6597039; doi:10.1371/journal.pone.0217627), 2019-06-27

**S9 Fig.** DEPT spectrum (CDCl<sub>3</sub>, 125MHz) of Hexylitaconic acid (2)

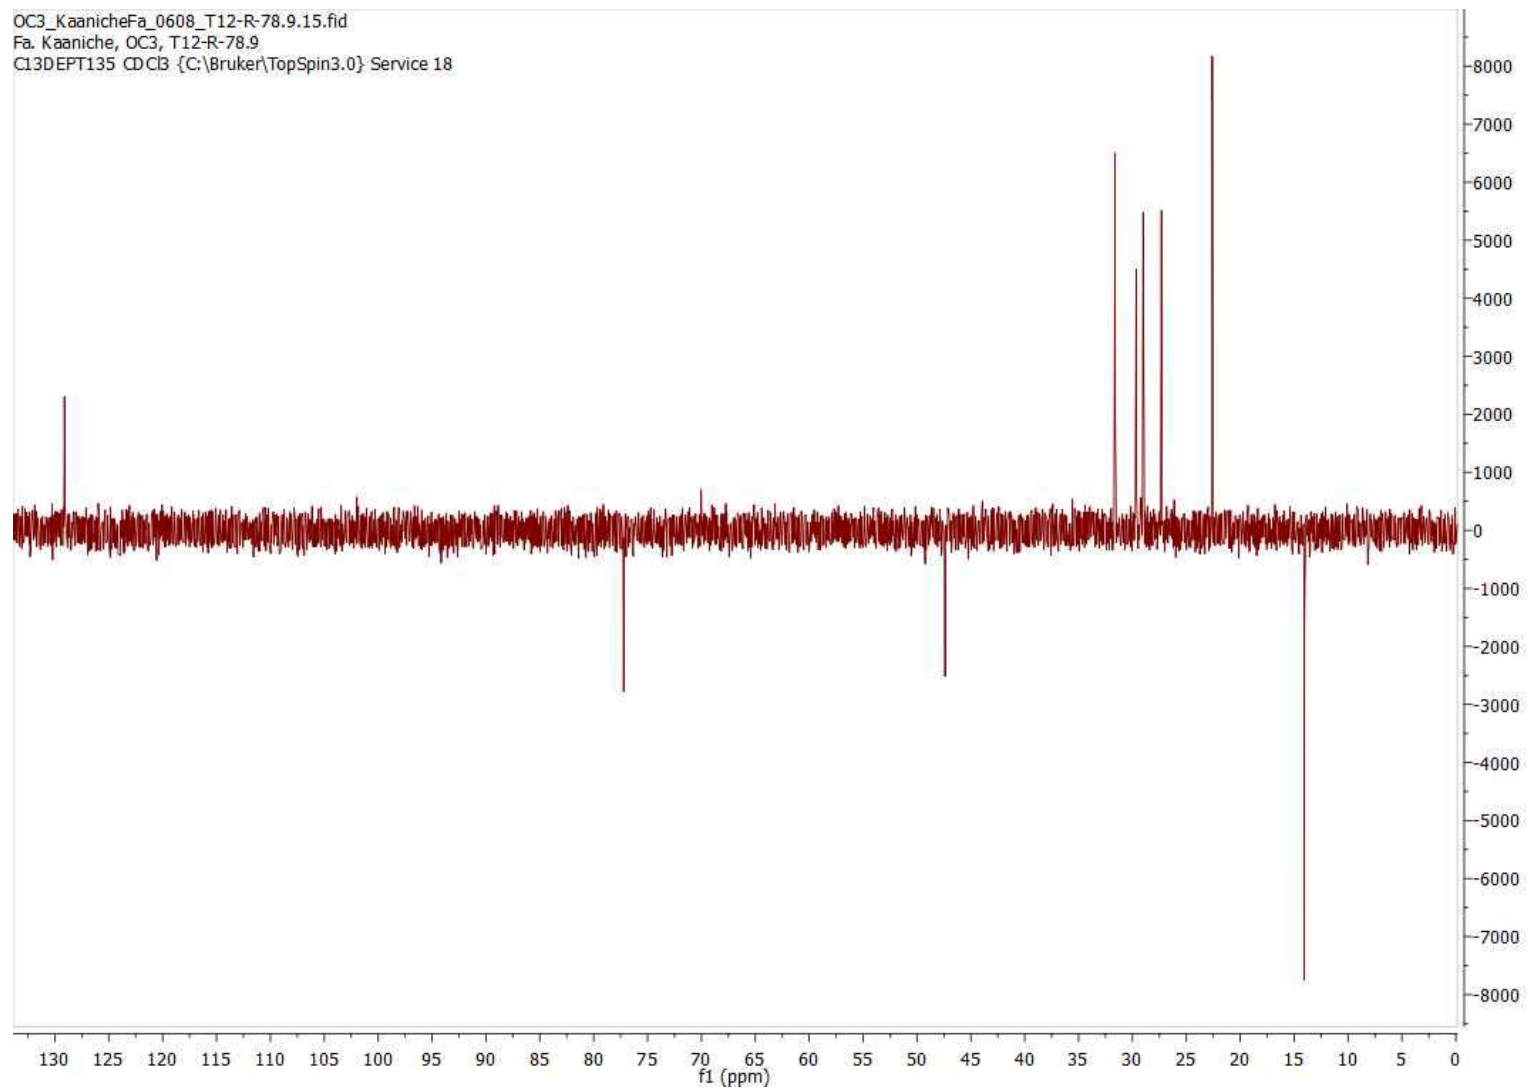

Supplement: pone.0217627.s011.pdf [file pone.0217627.s011.pdf]
