# Supplementary material for: Bioactive secondary metabolites from new endophytic fungus Curvularia. sp isolated from Rauwolfia macrophylla
Source: PubMed Central journal article supplement (PMC6597039; doi:10.1371/journal.pone.0217627), 2019-06-27

S11 Fig. HMQC spectrum (CDCl<sub>3</sub>, 500 MHz) of Hexylitaconic acid (2)

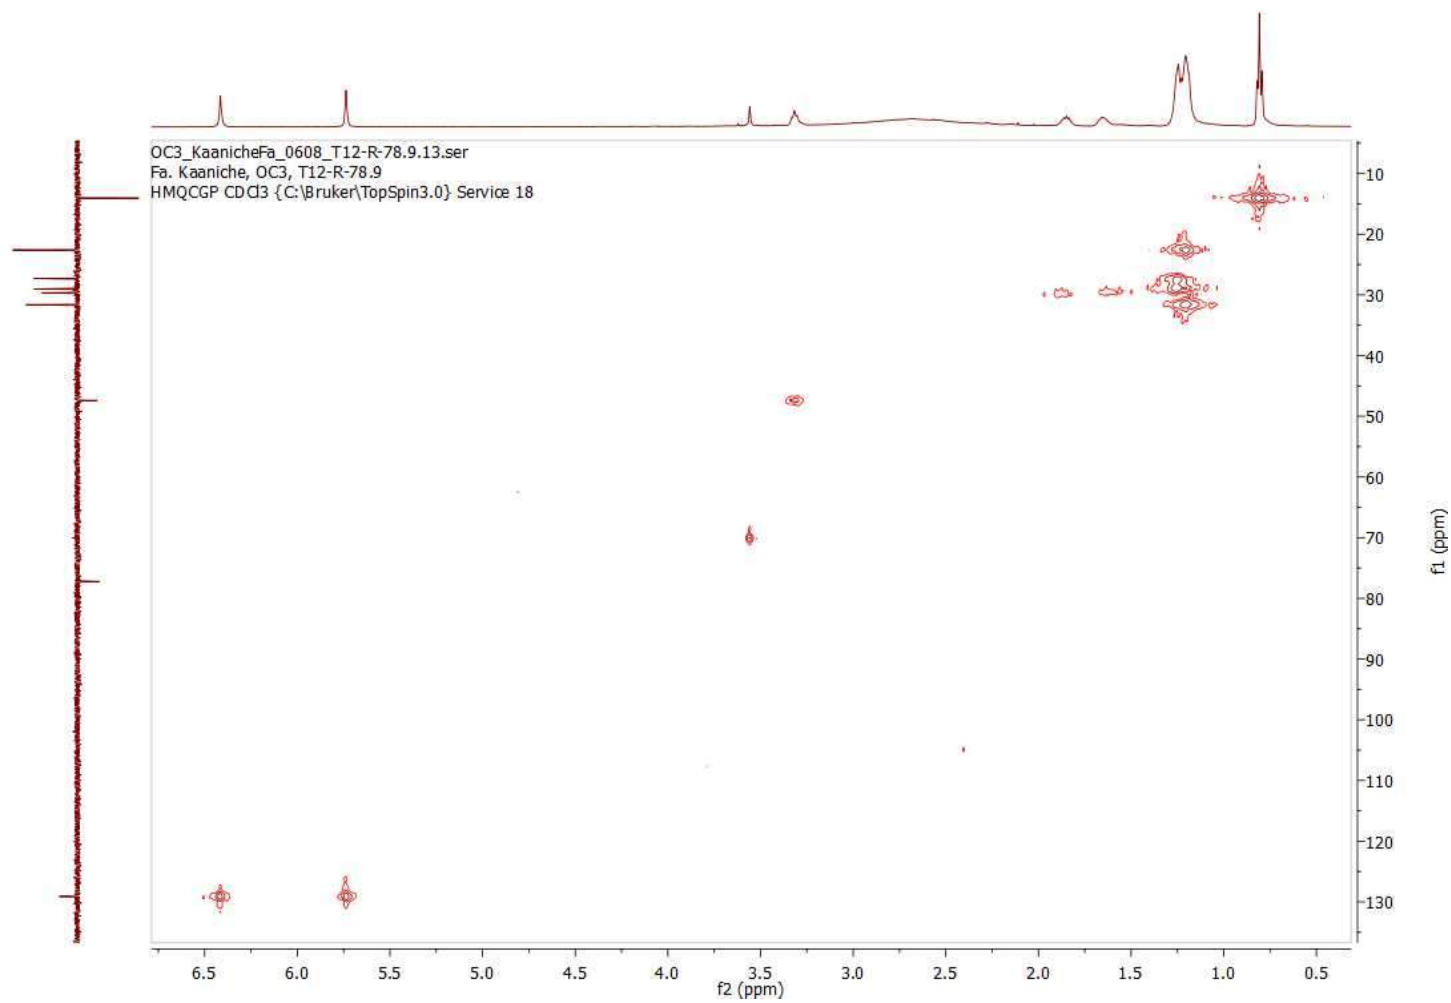

Supplement: pone.0217627.s013.pdf [file pone.0217627.s013.pdf]
