# Supplementary material for: Bioactive secondary metabolites from new endophytic fungus Curvularia. sp isolated from Rauwolfia macrophylla
Source: PubMed Central journal article supplement (PMC6597039; doi:10.1371/journal.pone.0217627), 2019-06-27

**S13 Fig.**  $^1\text{H}$  NMR spectrum ( $\text{CDCl}_3$ , 500 MHz) of ergosterol (**3**)

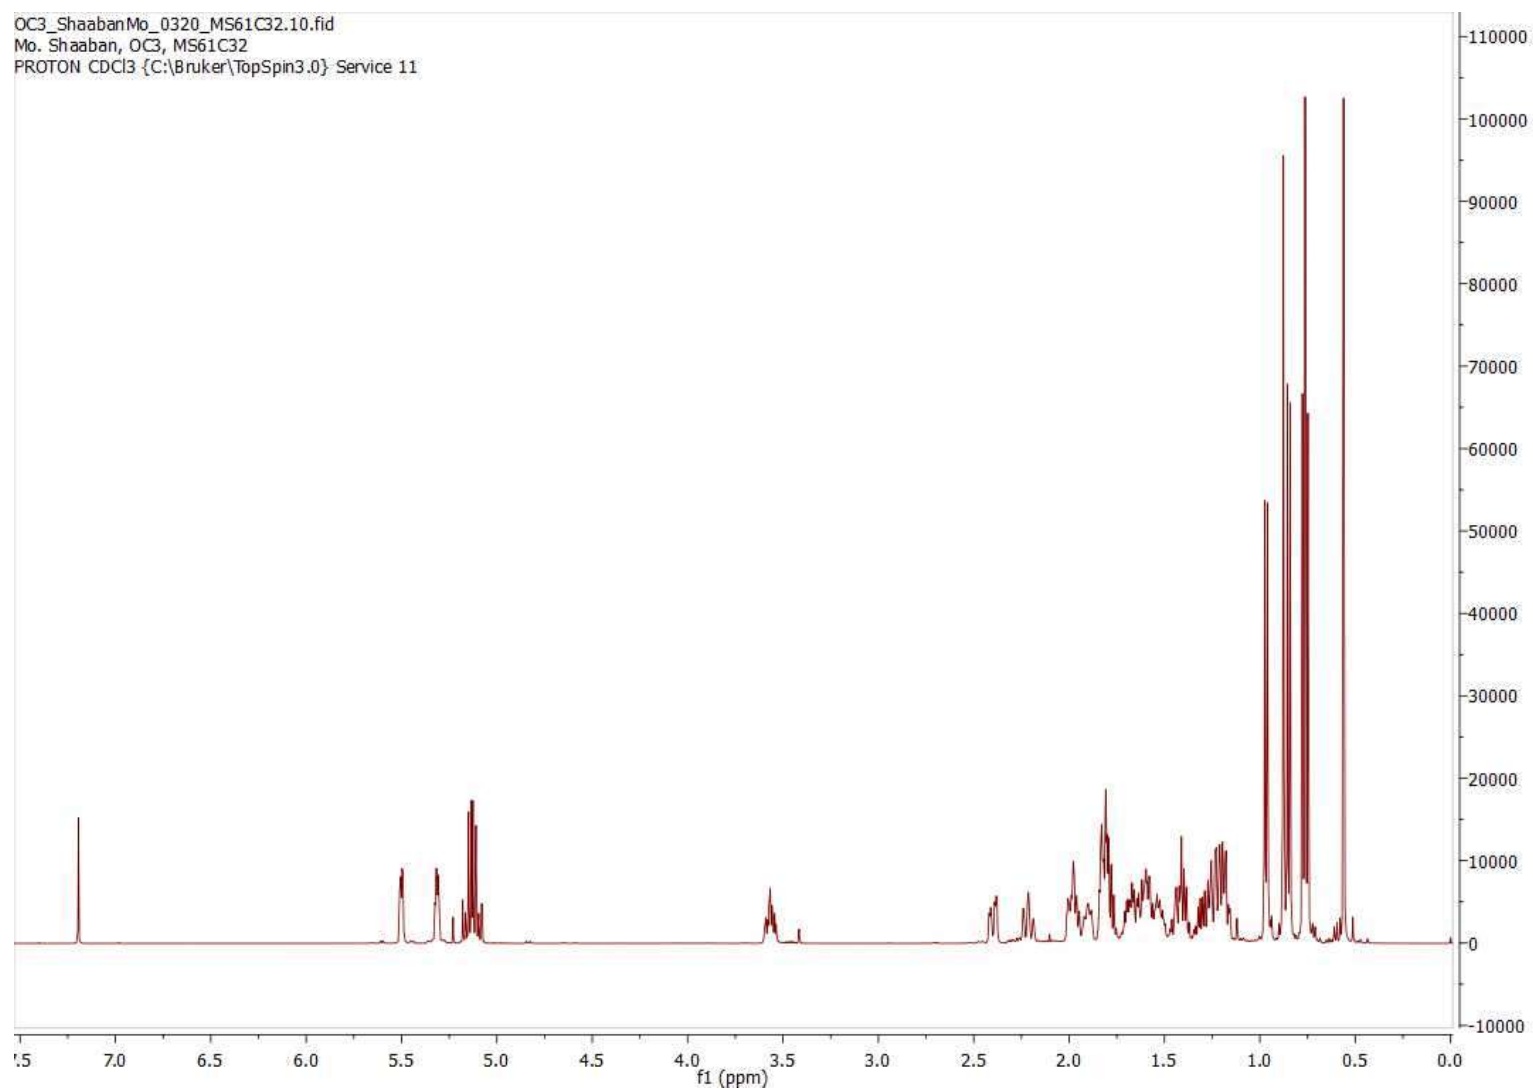

Supplement: pone.0217627.s015.pdf [file pone.0217627.s015.pdf]
