# Supplementary material for: Bioactive secondary metabolites from new endophytic fungus Curvularia. sp isolated from Rauwolfia macrophylla
Source: PubMed Central journal article supplement (PMC6597039; doi:10.1371/journal.pone.0217627), 2019-06-27

**S14 Fig.**  $^{13}\text{C}$  NMR spectrum ( $\text{CDCl}_3$ , 125MHz) of ergosterol (**3**)

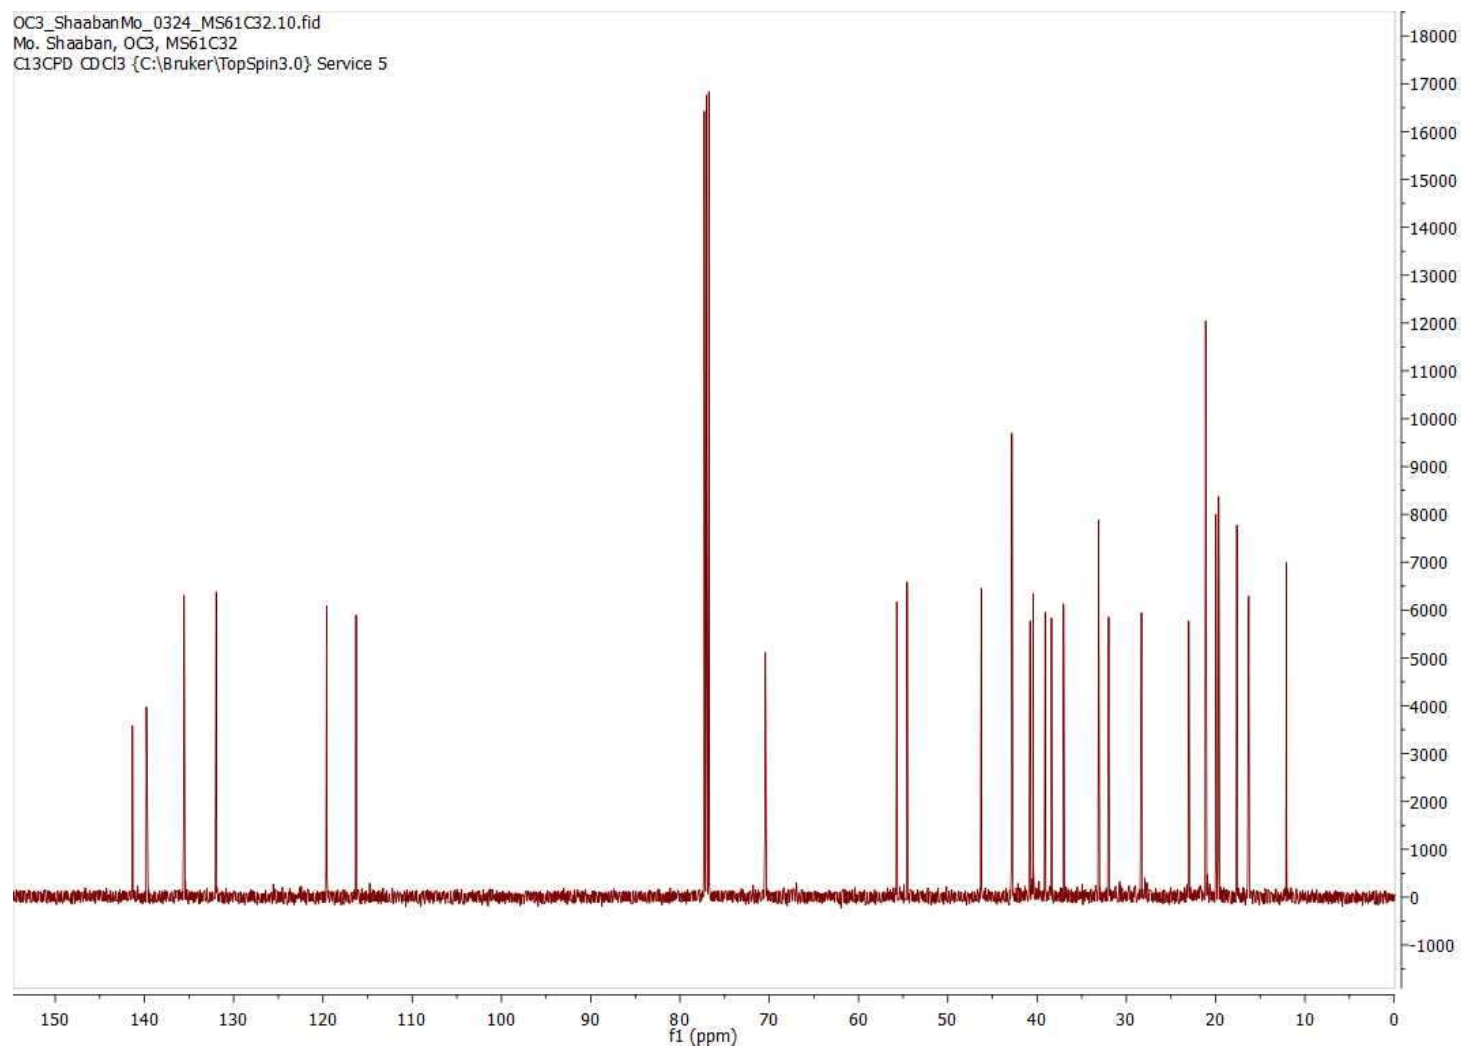

Supplement: pone.0217627.s016.pdf [file pone.0217627.s016.pdf]
